# Supplementary material
Source: MDPI journal article supplement (https://www.mdpi.com/2075-4701/8/4/281)
Supplement: s1 [file s1]

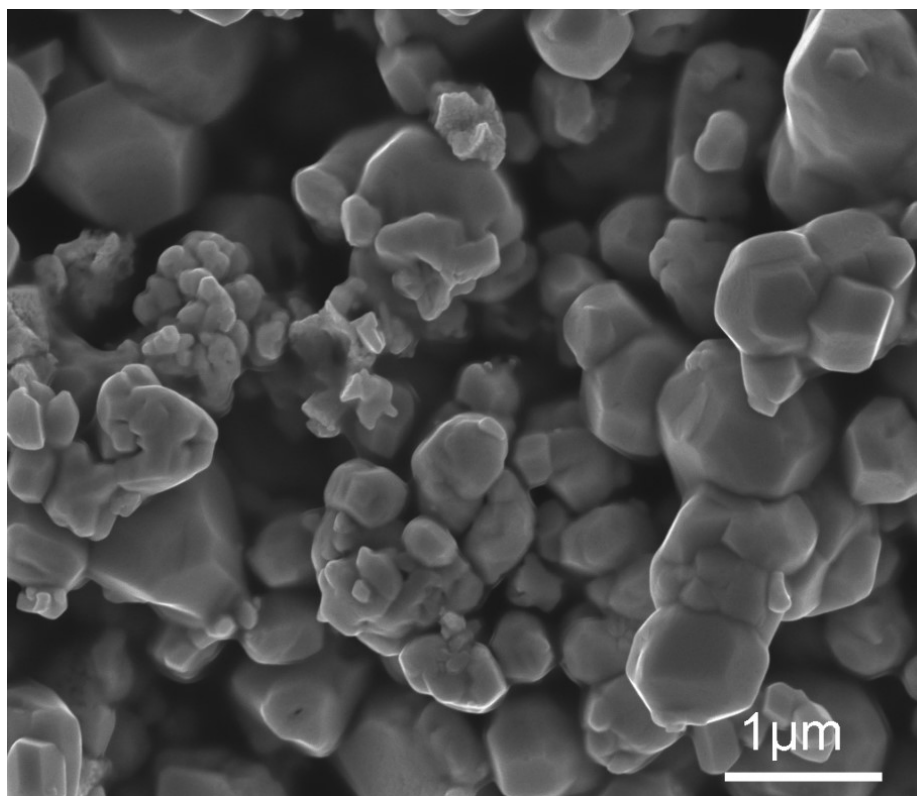

**Figure S1.** The SEM image of initial tungsten powder showing the small particles.

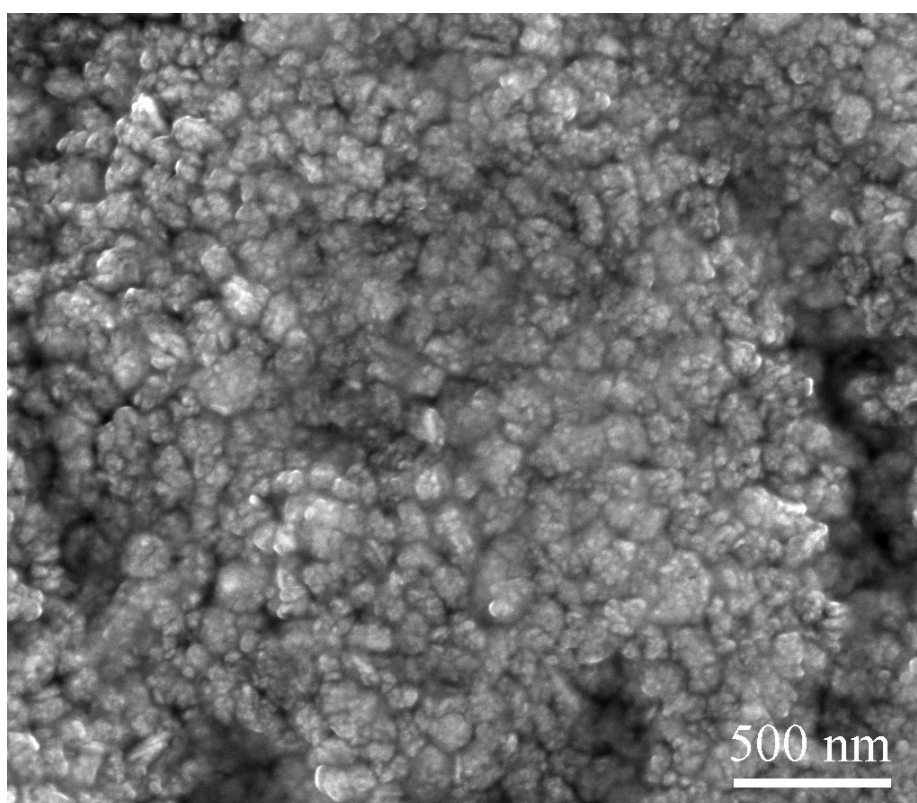

**Figure S2.** The SEM images of ball milled tungsten powder at 60 h with milling speed of 700 rpm and 8% PCA (process control agent). It shows two or more particle agglomerate together and form one large particle cluster.
